# Supplementary material for: Explicating anti-amyloidogenic role of curcumin and piperine via amyloid beta (Aβ) explicit pathway: recovery and reversal paradigm effects
Source: PeerJ. 2020 Sep 30;8:e10003. doi: 10.7717/peerj.10003 (PMC7532763; doi:10.7717/peerj.10003)
Supplement: Supplemental Information 1 [file peerj-08-10003-s001.xlsx]

## Sheet: GROUP 1 {CUR+AB}
Gene of Interest 1: SYPL1		Housekeeping gene					SYPL1
		Ct1	Ct2	Ct3	Average Ct		Ct1	Ct2	Ct3	Average Ct		ΔCt	ΔΔCt	2^-(ΔΔCt)
	Sample
	Control 1	21.32	21.33	21.34	21.33		25.71	25.72	25.73	25.72		4.39	0.16	0.895025		control	1.04129
	Control 2	21.14	21.15	21.16	21.15		25.43	25.44	26.45	25.7733		4.62333	0.393333	0.761368
	Control 3	22.56	22.72	22.73	22.67		26.35	26.37	26.32	26.3467		3.67667	-0.553333	1.46747
	Treated 1	23.11	23.15	23.16	23.14		27.45	27.56	27.57	27.5267		4.38667	0.156667	0.897095
	Treated 2	23.99	24.01	24.06	24.02		28.1	28.23	28.34	28.2233		4.20333	-0.0266667	1.01866		treated	2.55938		2.6 fold increase
	Treated 3	24.12	24.56	24.63	24.4367		26.1	26.15	26.17	26.14		1.70333	-2.52667	5.76239
	Control average										AvgΔCt	4.23
Gene of Interest : RAB 5		Housekeeping gene					RAB5
		Ct1	Ct2	Ct3	Average Ct		Ct1	Ct2	Ct3	Average Ct		ΔCt	ΔΔCt	2^-(ΔΔCt)
	Sample
	Control 1	17.18	17.21	17.22	17.2033		29.22	29.23	29.12	29.19		11.9867	0.508889	0.702763		control	1.02968
	Control 2	16.95	16.93	16.94	16.94		28.12	28.13	28.15	28.1333		11.1933	-0.284444	1.21794
	Control 3	17.01	17.13	17.21	17.1167		28.4	28.41	28.3	28.37		11.2533	-0.224444	1.16833
	Treated 1	16	16	16.1	16.0333		30.36	30.1	31.86	30.7733		14.74	3.26222	0.104225
	Treated 2	16.99	16.91	16.95	16.95		30.12	30.19	30.16	30.1567		13.2067	1.72889	0.301684		treated	0.301684		3.33 fold decrease
	Treated 3	17.9	17.86	17.88	17.88		30.23	30.34	30.34	30.3033		12.4233	0.945556	0.51923
	Control average										Avg ΔCt	11.4778
Gene of Interest : AK5		Housekeeping gene					AK5
		Ct1	Ct2	Ct3	Average Ct		Ct1	Ct2	Ct3	Average Ct		ΔCt	ΔΔCt	2^-(ΔΔCt)
	Sample
	Control 1	17.25	17.26	17.28	17.2633		30.12	30.15	30.16	30.1433		12.88	0.336667	0.791869		control	1.02366
	Control 2	18	18.2	18.3	18.1667		30.23	30.33	30.34	30.3		12.1333	-0.41	1.32869
	Control 3	18.24	18.23	18.24	18.2367		31.18	31.19	30.19	30.8533		12.6167	0.0733333	0.950439
	Treated 1	17.56	17.98	17.97	17.8367		33.23	32.34	29.48	31.6833		13.8467	1.30333	0.405189		treated	0.224562		5 fold decrease
	Treated 2	17.65	17.67	17.68	17.6667		32.34	32.56	32.65	32.5167		14.85	2.30667	0.202127
	Treated 3	18.02	18.23	18.21	18.1533		33.92	34.93	34.98	34.61		16.4567	3.91333	0.0663696
	Control average										AvgΔCt	12.5433
Gene of Interest : PICALM		Housekeeping gene					PICALM
		Ct1	Ct2	Ct3	Average Ct		Ct1	Ct2	Ct3	Average Ct		ΔCt	ΔΔCt	2^-(ΔΔCt)
	Sample
	Control 1	18.21	18.23	18.21	18.2167		26.71	26.72	26.73	26.72		8.50333	0.166667	0.890899		control	1
	Control 2	19.25	19.26	19.27	19.26		28.43	28.44	28.45	28.44		9.18	0.843333	0.557354
	Control 3	18.89	18.91	18.98	18.9267		26.22	26.23	26.31	26.2533		7.32667	-1.01	2.01391
	Treated 1	21.25	21.22	21.22	21.23		27.5	27.5	27.2	27.4		6.17	-2.16667	4.48985		treated	5.40985		5.4 fold increase
	Treated 2	22.03	22.36	22.26	22.2167		28.1	28.23	28.34	28.2233		6.00667	-2.33	5.02805
	Treated 3	20.56	20.78	20.31	20.55		26.1	26.15	26.17	26.14		5.59	-2.74667	6.71165
	Control average										AvgΔCt	8.33667
Gene of Interest : CASP8AP2		Housekeeping gene					CASP8A2
		Ct1	Ct2	Ct3	Average Ct		Ct1	Ct2	Ct3	Average Ct		ΔCt	ΔΔCt	2^-(ΔΔCt)
	Sample
	Control 1	22.32	22.33	21.34	21.9967		25.71	25.72	25.73	25.72		3.72333	-0.276667	1.21139		control	1.04125
	Control 2	21.18	21.16	21.17	21.17		25.43	25.44	26.45	25.7733		4.60333	0.603333	0.658231
	Control 3	22.65	22.68	22.69	22.6733		26.35	26.37	26.32	26.3467		3.67333	-0.326667	1.25411
	Treated 1	23.16	23.22	23.45	23.2767		27.45	27.56	27.57	27.5267		4.25	0.25	0.840896
	Treated 2	24.99	24.89	24.95	24.9433		28.1	28.23	28.34	28.2233		3.28	-0.72	1.64718		treated	3.06657		3.1 fold increase
	Treated 3	24.92	24.79	24.95	24.8867		26.1	26.15	26.17	26.14		1.25333	-2.74667	6.71165
	Control average										AvgΔCt	4
Gene of Interest : APOE		Housekeeping gene					APOE
		Ct1	Ct2	Ct3	Average Ct		Ct1	Ct2	Ct3	Average Ct		ΔCt	ΔΔCt	2^-(ΔΔCt)
	Sample
	Control 1	29.74	29.56	29.68	29.66		18.21	18.16	18.22	18.1967		-11.4633	-0.384444	1.30536		control	1.03186
	Control 2	28.5	28.45	28.66	28.5367		17.96	17.95	17.96	17.9567		-10.58	0.498889	0.707652
	Control 3	27.17	30.22	30.35	29.2467		18	18.05	18.11	18.0533		-11.1933	-0.114444	1.08256
	Treated 1	24.1	24.98	24.76	24.6133		20.04	20.08	20.07	20.0633		-4.55	6.52889	0.0108295		treated	0.0585411		16.67 fold decrease
	Treated 2	25.13	25.9	25.45	25.4933		18.99	18.91	18.95	18.95		-6.54333	4.53556	0.0431183
	Treated 3	30	31.24	28.98	30.0733		21	22.45	22.65	22.0333		-8.04	3.03889	0.121676
	Control average										AvgΔCt	-11.0789
Gene of Interest : GABARAPL1		Housekeeping gene					GABARAPL1
		Ct1	Ct2	Ct3	Average Ct		Ct1	Ct2	Ct3	Average Ct		ΔCt	ΔΔCt	2^-(ΔΔCt)
	Sample
	Control 1	21.63	22.33	21.45	21.8033		28.71	28.72	29.73	29.0533		7.25	-0.208889	1.1558		control	1.01766
	Control 2	22.14	21.98	21.99	22.0367		29.3	29.31	29.33	29.3133		7.27667	-0.182222	1.13463
	Control 3	22.56	22.72	22.73	22.67		30.51	29.52	31.53	30.52		7.85	0.391111	0.762542
	Treated 1	19.25	19.15	19.16	19.1867		27.63	27.64	27.65	27.64		8.45333	0.994444	0.501929		treated	4.00326		4 fold increase
	Treated 2	22.04	22.01	22.06	22.0367		27.17	27.32	27.35	27.28		5.24333	-2.21556	4.6446
	Treated 3	21.11	21.14	21.15	21.1333		26.12	26.15	25.17	25.8133		4.68	-2.77889	6.86324
	Control average										AvgΔCt	7.45889

## Sheet: GROUP 2 {Pip+AB}
Gene of Interest : RAB5		Housekeeping gene					RAB5
		Ct1	Ct2	Ct3	Average Ct		Ct1	Ct2	Ct3	Average Ct		ΔCt	ΔΔCt	2^-(ΔΔCt)
	Sample
	Control 1	28.71	27.72	28.73	28.3867		18.63	18.33	18.6	18.52		-9.86667	-0.765556	1.70002		control	1
	Control 2	28.43	27.94	28.45	28.2733		19.14	19.98	19.14	19.42		-8.85333	0.247778	0.842193
	Control 3	27.22	27.23	27.31	27.2533		18.56	18.72	18.73	18.67		-8.58333	0.517778	0.698447
	Treated 1	25.5	25.98	25.2	25.56		19.25	19.15	19.16	19.1867		-6.37333	2.72778	0.150958		treated	0.06231		16.13 fold decrease
	Treated 2	24.1	23.99	23.34	23.81		22.04	22.01	22.06	22.0367		-1.77333	7.32778	0.00622471
	Treated 3	25.17	25.15	25.17	25.1633		21.11	21.14	21.15	21.1333		-4.03	5.07111	0.029747
	Control average										Avg ΔCt	-9.10111
Gene of Interest : AK5		Housekeeping gene					AK5
		Ct1	Ct2	Ct3	Average Ct		Ct1	Ct2	Ct3	Average Ct		ΔCt	ΔΔCt	2^-(ΔΔCt)
	Sample
	Control 1	33.74	33.56	30.68	32.66		35.16	35.2	35.33	35.23		2.57	0.0155556	0.989276		control	1.04519
	Control 2	31.5	33.45	31.66	32.2033		34.15	34.25	34.27	34.2233		2.02	-0.534444	1.44838
	Control 3	32.17	32.22	32.35	32.2467		35.06	35.12	35.78	35.32		3.07333	0.518889	0.697909
	Treated 1	29.1	29.45	29.76	29.4367		36.45	35.14	35.67	35.7533		6.31667	3.76222	0.0736984		treated	0.0666902		10 fold decrease
	Treated 2	29.8	29.9	29.45	29.7167		35.67	36.87	35.84	36.1267		6.41	3.85556	0.0690816
	Treated 3	27.22	27.24	27.98	27.48		33.11	34.54	34.83	34.16		6.68	4.12556	0.0572907
	Control average										Avg ΔCt	2.55444
Gene of Interest : CASP8AP2		Housekeeping gene					CASP8A2
		Ct1	Ct2	Ct3	Average Ct		Ct1	Ct2	Ct3	Average Ct		ΔCt	ΔΔCt	2^-(ΔΔCt)
	Sample
	Control 1	18.25	18.26	18.22	18.2433		34.16	34.2	34.33	34.23		15.9867	0.887778	0.540446		control	1
	Control 2	18.96	18.95	18.96	18.9567		33.15	33.25	33.27	33.2233		14.2667	-0.832222	1.78043
	Control 3	19.07	19.05	19.11	19.0767		34.06	34.12	34.18	34.12		15.0433	-0.0555556	1.03926
	Treated 1	21.25	21.22	21.56	21.3433		33.45	33.14	33.67	33.42		12.0767	-3.02222	8.12418		treated	13.3379		13.3 fold increase
	Treated 2	21.03	21.36	21.26	21.2167		31.67	31.87	31.84	31.7933		10.5767	-4.52222	22.9787
	Treated 3	20.56	20.78	20.31	20.55		32.11	32.54	32.83	32.4933		11.9433	-3.15556	8.9108
	Control average										Avg.ΔCt	15.0989
Gene of Interest : PSEN1		Housekeeping gene					PSEN 1
		Ct1	Ct2	Ct3	Average Ct		Ct1	Ct2	Ct3	Average Ct		ΔCt	ΔΔCt	2^-(ΔΔCt)
	Sample
	Control 1	28.67	27.68	28.69	28.3467		18.56	18.55	18.6	18.57		-9.77667	-0.598889	1.51455		control	1
	Control 2	28.39	27.4	28.38	28.0567		19.13	19.97	19.14	19.4133		-8.64333	0.534444	0.690424
	Control 3	27.56	27.55	27.54	27.55		18.46	18.42	18.43	18.4367		-9.11333	0.0644444	0.956314
	Treated 1	25.45	25.44	25.43	25.44		19.24	19.17	19.17	19.1933		-6.24667	2.93111	0.131114		treated	0.0548442		18.18 fold decrease
	Treated 2	24.1	24.11	24.12	24.11		22.14	22.16	22.18	22.16		-1.95	7.22778	0.00667148
	Treated 3	25.12	25.15	25.16	25.1433		21.12	21.22	21.23	21.19		-3.95333	5.22444	0.0267476
	Control average										Avg ΔCt	-9.17778
Gene of Interest : CREB1		Housekeeping gene					CREB1
		Ct1	Ct2	Ct3	Average Ct		Ct1	Ct2	Ct3	Average Ct		ΔCt	ΔΔCt	2^-(ΔΔCt)
	Sample
	Control 1	18.19	18.16	18.18	18.1767		34.16	34.2	34.33	34.23		16.0533	0.598889	0.660262		control	1.04299
	Control 2	17.96	17.95	17.96	17.9567		33.15	33.25	33.27	33.2233		15.2667	-0.187778	1.13901
	Control 3	19.07	19.05	19.11	19.0767		34.06	34.12	34.18	34.12		15.0433	-0.411111	1.32971
	Treated 1	21.25	21.22	21.56	21.3433		33.45	33.14	33.67	33.42		12.0767	-3.37778	10.3947		treated	26.8658		26.9 fold increase
	Treated 2	22.03	22.36	22.26	22.2167		31.67	31.87	31.84	31.7933		9.57667	-5.87778	58.8014
	Treated 3	20.56	20.78	20.31	20.55		32.11	32.54	32.83	32.4933		11.9433	-3.51111	11.4012
	Control average										Avg.ΔCt	15.4544
Gene of Interest : GABARAPL1		Housekeeping gene					GABARAPL1
		Ct1	Ct2	Ct3	Average Ct		Ct1	Ct2	Ct3	Average Ct		ΔCt	ΔΔCt	2^-(ΔΔCt)
	Sample
	Control 1	19.25	19.23	19.28	19.2533		27.71	27.72	27.63	27.6867		8.43333	0.952222	0.516836		control	1
	Control 2	19.34	19.36	19.38	19.36		26.31	26.34	26.51	26.3867		7.02667	-0.454444	1.37026
	Control 3	19.24	19.18	19.22	19.2133		26.18	26.19	26.22	26.1967		6.98333	-0.497778	1.41204
	Treated 1	23.25	23.17	23.22	23.2133		26.5	26.62	26.78	26.6333		3.42	-4.06111	16.6923		treated	17.418		17.4 fold increase
	Treated 2	23.19	23.24	23.28	23.2367		27.18	26.23	27.34	26.9167		3.68	-3.80111	13.9395
	Treated 3	23.14	23.17	23.31	23.2067		26.22	26.23	26.31	26.2533		3.04667	-4.43444	21.6222
	Control average										AvgΔCt	7.48111

## Sheet: GROUP 3 {CP+AB}
Gene of Interest 1: RAB5		Housekeeping gene					RAB5
		Ct1	Ct2	Ct3	Average Ct		Ct1	Ct2	Ct3	Average Ct		ΔCt	ΔΔCt	2^-(ΔΔCt)
	Sample
	Control 1	28.14	28.15	28.12	28.1367		18.78	19.02	18.56	18.7867		-9.35	0.00111111	0.99923		control	1
	Control 2	28.8	28.78	28.72	28.7667		19.12	18.34	18.56	18.6733		-10.0933	-0.742222	1.67275
	Control 3	27.75	27.76	27.77	27.76		19.13	19.14	19.18	19.15		-8.61	0.741111	0.598278
	Treated 1	25.66	26.68	25.69	26.01		18.78	18.76	18.97	18.8367		-7.17333	2.17778	0.221016		treated	0.0816071		12.5 fold decrease
	Treated 2	23.12	23.16	23.15	23.1433		20.15	20.16	20.17	20.16		-2.98333	6.36778	0.012109
	Treated 3	24.62	24.56	24.57	24.5833		21.63	21.65	21.67	21.65		-2.93333	6.41778	0.0116965
	Control average										Avg ΔCt	-9.35111
Gene of Interest : AK5		Housekeeping gene					AK5
		Ct1	Ct2	Ct3	Average Ct		Ct1	Ct2	Ct3	Average Ct		ΔCt	ΔΔCt	2^-(ΔΔCt)
	Sample
	Control 1	28.12	28.15	28.11	28.1267		18.65	18.76	18.78	18.73		-9.39667	-0.276667	1.21139		control	1
	Control 2	28.11	28.11	28.1	28.1067		19.34	19.35	19.36	19.35		-8.75667	0.363333	0.777366
	Control 3	27.87	27.87	27.88	27.8733		18.55	18.72	18.73	18.6667		-9.20667	-0.0866667	1.06191
	Treated 1	25.71	26.72	25.74	26.0567		19.41	19.42	19.35	19.3933		-6.66333	2.45667	0.182167		treated	0.0698433		14.28 fold decrease
	Treated 2	23.18	23.24	23.25	23.2233		22.11	22.13	22.14	22.1267		-1.09667	8.02333	0.00384358
	Treated 3	24.89	24.88	24.87	24.88		21.16	21.17	21.18	21.17		-3.71	5.41	0.0235195
	Control average										Avg ΔCt	-9.12
Gene of Interest :ADAMTS5		Housekeeping gene					ADAMTS5
		Ct1	Ct2	Ct3	Average Ct		Ct1	Ct2	Ct3	Average Ct		ΔCt	ΔΔCt	2^-(ΔΔCt)
	Sample
	Control 1	21.12	22.13	21.13	21.46		28.67	28.68	29.7	29.0167		7.55667	-0.541111	1.45509		control	1
	Control 2	22.23	21.24	21.25	21.5733		29.22	29.23	29.24	29.23		7.65667	-0.441111	1.35765
	Control 3	21.45	21.48	21.44	21.4567		30.53	29.52	31.56	30.5367		9.08	0.982222	0.506199
	Treated 1	19.25	19.15	19.16	19.1867		27.61	27.62	27.63	27.62		8.43333	0.335556	0.792479		treated	3.30618		3.3 fold increase
	Treated 2	18.08	18.11	18.04	18.0767		27.18	27.15	27.32	27.2167		9.14	1.04222	0.485579
	Treated 3	20.11	21.13	21.16	20.8		26.11	26.11	25.14	25.7867		4.98667	-3.11111	8.64048
	Control average										AvgΔCt	8.09778
Gene of Interest : GABARAPL1		Housekeeping gene					GABARAPL1
		Ct1	Ct2	Ct3	Average Ct		Ct1	Ct2	Ct3	Average Ct		ΔCt	ΔΔCt	2^-(ΔΔCt)
	Sample
	Control 1	17.19	17.16	17.18	17.1767		31.12	31.15	31.16	31.1433		13.9667	0.493333	0.710382		control	1.03036
	Control 2	16.96	16.95	16.96	16.9567		30.23	30.33	30.34	30.3		13.3433	-0.13	1.09429
	Control 3	17.07	17.05	17.11	17.0767		30.18	30.19	30.19	30.1867		13.11	-0.363333	1.28639
	Treated 1	22.36	22.45	22.97	22.5933		34	33	32	33		10.4067	-3.06667	8.37835		treated	17.8746		17.9 fold increase
	Treated 2	23.03	23.36	23.26	23.2167		32.11	32.54	32.83	32.4933		9.27667	-4.19667	18.3368
	Treated 3	24.56	24.78	24.31	24.55		33.4	33.12	33.3	33.2733		8.72333	-4.75	26.9087
	Control average										Avg.ΔCt	13.4733
